# Supplementary material
Source: Springer Nature journal article supplement (https://www.springermedizin.de/resource/supplementary/12882_2012_502_MOESM1_ESM.pdf/9454276)
Supplement: MOESM1 [file 9454276]

112 eligible patients identified

7 could not be contacted

105 invited to participate

19 refused to participate

22 did not respond

14 lost to follow-up

50 agreed to participate and provided informed consent

1 withdrew consent

49 provided baseline data
